# Supplementary material for: Single-cell analysis of human retina identifies evolutionarily conserved and species-specific mechanisms controlling development
Source: bioRxiv preprint, doi:10.1101/779694, version 1 (2019-10-02)
Supplement: Supplemental Table S1 [file 779694_file04.pdf]

| Sample     | Sample type  | Cells Removed |            |                      |          |                   |      | RPCs | Neurogenic | RGCs | AC/HC | Pre Horizontal | Cones | Amacrine | Photo/BC | Pre Rods | Bipolar | Muller | Glia |
|------------|--------------|---------------|------------|----------------------|----------|-------------------|------|------|------------|------|-------|----------------|-------|----------|----------|----------|---------|--------|------|
|            |              | Total Cells   | Non-Retina | >=10,000 Transcripts | Doublets | FINAL CELL NUMBER |      |      |            |      |       |                |       |          |          |          |         |        |      |
| 24_Day     | Organoid     | 9871          | 9847       | 9871                 | 0        | 0                 | 24   | 24   | 23         | 0    | 1     | 0              | 0     | 0        | 0        | 0        | 0       | 0      | 0    |
| 30_Day     | Organoid     | 2255          | 1973       | 107                  | 0        |                   | 175  | 175  | 157        | 8    | 7     | 0              | 0     | 3        | 0        | 0        | 0       | 0      |      |
| 42_Day     | Organoid     | 7735          | 1732       | 84                   | 0        |                   | 5919 | 5919 | 3194       | 397  | 719   | 9              | 7     | 1588     | 1        | 4        | 0       | 0      |      |
| 59_Day     | Organoid     | 5612          | 151        | 37                   | 0        |                   | 5424 | 5424 | 4045       | 315  | 559   | 157            | 165   | 125      | 25       | 32       | 0       | 1      |      |
| Hgw9       | Whole Retina | 9428          | 43         | 408                  | 3        |                   | 8974 | 8974 | 6129       | 547  | 1885  | 84             | 201   | 117      | 5        | 6        | 0       | 0      |      |
| Hgw11      | Whole Retina | 8396          | 37         | 300                  | 1        |                   | 8058 | 8058 | 3153       | 354  | 3470  | 213            | 545   | 236      | 30       | 51       | 3       | 3      |      |
| Hgw12      | Whole Retina | 5526          | 7          | 45                   | 7        |                   | 5467 | 5467 | 1731       | 222  | 942   | 398            | 1137  | 111      | 218      | 632      | 45      | 31     |      |
| Hgw13      | Whole Retina | 10525         | 10         | 471                  | 132      |                   | 9912 | 9912 | 4315       | 348  | 1850  | 278            | 863   | 1212     | 421      | 317      | 211     | 97     |      |
| Hgw14      | Whole Retina | 3123          | 14         | 78                   | 73       |                   | 2958 | 2958 | 361        | 90   | 26    | 54             | 316   | 22       | 1825     | 52       | 160     | 51     |      |
| Hgw15      | Whole Retina | 7608          | 12         | 23                   | 93       |                   | 7480 | 7480 | 2397       | 294  | 341   | 152            | 677   | 961      | 1071     | 290      | 1079    | 218    |      |
| Hgw16      | Whole Retina | 3805          | 6          | 531                  | 72       |                   | 3196 | 3196 | 1104       | 166  | 38    | 79             | 432   | 72       | 950      | 75       | 253     | 27     |      |
| Hgw17      | Whole Retina | 6181          | 13         | 39                   | 95       |                   | 6034 | 6034 | 1201       | 198  | 99    | 108            | 404   | 720      | 1182     | 164      | 1660    | 295    |      |
| Hgw18      | Whole Retina | 3817          | 7          | 154                  | 91       |                   | 3565 | 3565 | 1777       | 266  | 1     | 73             | 197   | 22       | 525      | 169      | 344     | 188    |      |
| Hgw19_rep1 | Whole Retina | 4485          | 16         | 33                   | 104      |                   | 4332 | 4332 | 1022       | 119  | 65    | 20             | 187   | 371      | 762      | 94       | 1541    | 144    |      |
| Hgw19_rep2 | Whole Retina | 4086          | 6          | 56                   | 125      |                   | 3899 | 3899 | 925        | 98   | 51    | 38             | 198   | 310      | 682      | 100      | 1402    | 90     |      |
| Hgw20_rep1 | Macula       | 5581          | 6          | 314                  | 201      |                   | 5060 | 5060 | 78         | 5    | 110   | 1              | 327   | 41       | 621      | 9        | 1083    | 2588   |      |
| Hgw20_rep2 | Periphery    | 8424          | 5          | 432                  | 354      |                   | 7633 | 7633 | 3592       | 253  | 67    | 92             | 353   | 164      | 1622     | 177      | 1266    | 47     |      |
| Hgw22      | Whole Retina | 2454          | 10         | 144                  | 70       |                   | 2230 | 2230 | 255        | 44   | 14    | 28             | 139   | 29       | 284      | 60       | 1066    | 296    |      |
| Hgw24_rep1 | Whole Retina | 2984          | 2          | 199                  | 90       |                   | 2693 | 2693 | 782        | 111  | 0     | 52             | 179   | 25       | 195      | 131      | 708     | 503    |      |
| Hgw24_rep2 | Whole Retina | 4888          | 18         | 238                  | 164      |                   | 4468 | 4468 | 1353       | 184  | 0     | 60             | 311   | 18       | 434      | 166      | 821     | 1084   |      |
| Hgw27      | Whole Retina | 2232          | 14         | 108                  | 56       |                   | 2054 | 2054 | 185        | 21   | 0     | 4              | 35    | 18       | 132      | 21       | 1249    | 321    |      |
| Hpnd8_rep1 | Macula       | 4167          | 138        | 16                   | 3        |                   | 4010 | 4010 | 28         | 0    | 0     | 0              | 39    | 2        | 5        | 0        | 2536    | 1373   |      |
| Hpnd8_rep2 | Periphery    | 3424          | 17         | 18                   | 17       |                   | 3372 | 3372 | 13         | 0    | 0     |                |       |          |          |          |         |        |      |

|                            |         |
|----------------------------|---------|
| <b>Final Retinal Cells</b> | 118,555 |
|----------------------------|---------|
