# Supplementary material for: Single-cell analysis of human retina identifies evolutionarily conserved and species-specific mechanisms controlling development
Source: bioRxiv or medRxiv preprint supplement (doi:10.1101/779694), 2019-10-02
Supplement: Supplementary file [file media-4.pdf]

**Table S3 - Input parameters for Scanpy**

| <b>Trajectory</b>               | <b>Batch Correction</b>                                                                                                               | <b>Scanpy Variable Genes Parameters</b> | <b>Neighbors for Diffusion Map</b>                            | <b>Number of Diffusion Components for Diffusion Pseudotime</b> |
|---------------------------------|---------------------------------------------------------------------------------------------------------------------------------------|-----------------------------------------|---------------------------------------------------------------|----------------------------------------------------------------|
| Amacrine Cells                  | None                                                                                                                                  | Seurat default parameters               | UMAP (30 canberra)                                            | 15                                                             |
| Bipolar vs. Photoreceptors      | Combat (Pedersen et al. 2012) between FACS and non-FACS sorted cells, scanpy regress_out Total_mRNAs                                  | Cell Ranger, 3000 top genes             | UMAP (100 euclidean)                                          | 8                                                              |
| Horizontal Cells                | BBKNN between FACS and non-FACS sorted cells.                                                                                         | Seurat, default parameters              | BBKNN (neighbors within batch = 30, trim=0, metric = angular) | 15                                                             |
| Cones vs. Rods                  | Same as Horizontal Cells                                                                                                              | Seurat, max_mean=4, n_bins=14           | BBKNN (default parameters, trim= 100)                         | 7                                                              |
| Retinal Ganglion Cells          | None                                                                                                                                  | Cell Ranger, 2000 top genes             | UMAP (50 canberra)                                            | 15                                                             |
| Organoid vs. Human Retina Cones | None                                                                                                                                  | Seurat, default                         | UMAP (7 canberra)                                             | 15                                                             |
| Muller Glia                     | BBKNN between organoids, FACS and non-FACS sorted cells.<br>Monocle 3 preprocessCDS between organoids, FACS and non-FACS sorted cells | None                                    | BBKNN (neighbors within batch = 10, trim = 0, n_trees=20)     | 15                                                             |
| Neurogenic Cells                | FACS sorted cells                                                                                                                     | Seurat, default parameter               | UMAP(15 canberra)                                             | 15                                                             |
